# Supplementary material for: A different angle: comparative analyses of whole-animal transport costs running uphill
Source: Oxford University Press journal article supplement (doi:10.1242/jeb.142927), 2016-01-01
Supplement: jeb142927supp.pdf [file jeb142927supp.pdf]

Table S1. Data for net cost of transport (NCOT, J/m) and body mass (kg) for animals locomoting on the level and at a range of inclines.

| Species                         | Gradient (°) | Mass (kg) | NCOT (J/m) | Reference                  |
|---------------------------------|--------------|-----------|------------|----------------------------|
| <i>Pan troglodytes</i>          | 0            | 17.5      | 87.938     | Taylor et al. (1972)       |
| <i>Pan troglodytes</i>          | 15           | 17.5      | 154.770    | Taylor et al. (1972)       |
| <i>Mus musculus</i>             | 0            | 0.032     | 1.331      | Taylor et al. (1972)       |
| <i>Mus musculus</i>             | 15           | 0.032     | 1.672      | Taylor et al. (1972)       |
| <i>Mus musculus</i>             | 0            | 0.035     | 0.950      | Snyder and Carello (2008)  |
| <i>Mus musculus</i>             | 10           | 0.035     | 1.259      | Snyder and Carello (2008)  |
| <i>Coturnix chinensis</i>       | 0            | 0.043     | 1.219      | Snyder and Carello (2008)  |
| <i>Coturnix chinensis</i>       | 10           | 0.043     | 2.256      | Snyder and Carello (2008)  |
| <i>Oreortyx pictus</i>          | 0            | 0.211     | 3.350      | Snyder and Carello (2008)  |
| <i>Oreortyx pictus</i>          | 10           | 0.211     | 4.623      | Snyder and Carello (2008)  |
| <i>Rattus norvegicus</i>        | 0            | 0.217     | 3.010      | Snyder and Carello (2008)  |
| <i>Rattus norvegicus</i>        | 10           | 0.217     | 3.620      | Snyder and Carello (2008)  |
| <i>Rattus norvegicus</i>        | 0.6          | 0.2       | 3.337      | Brooks and White (1978)    |
| <i>Rattus norvegicus</i>        | 2.9          | 0.2       | 3.457      | Brooks and White (1978)    |
| <i>Rattus norvegicus</i>        | 5.7          | 0.2       | 3.618      | Brooks and White (1978)    |
| <i>Rattus norvegicus</i>        | 8.5          | 0.2       | 3.337      | Brooks and White (1978)    |
| <i>Rattus norvegicus</i>        | 11.3         | 0.2       | 3.578      | Brooks and White (1978)    |
| <i>Rattus norvegicus</i>        | 16           | 0.3       | 7.538      | Armstrong et al. (1983)    |
| <i>Rattus norvegicus</i>        | 0            | 0.3       | 5.306      | Armstrong et al. (1983)    |
| <i>Coturnix coturnix</i>        | 0            | 0.154     | 1.359      | Warncke et al. (1988)      |
| <i>Coturnix coturnix</i>        | 4            | 0.154     | 2.468      | Warncke et al. (1988)      |
| <i>Coturnix coturnix</i>        | 8            | 0.154     | 2.674      | Warncke et al. (1988)      |
| <i>Coturnix coturnix</i>        | 12           | 0.154     | 2.167      | Warncke et al. (1988)      |
| <i>Rangifer tarandus</i>        | 6            | 101.9     | 441.690    | Fancy and White (1987)     |
| <i>Rangifer tarandus</i>        | 4.9          | 101.9     | 352.260    | Fancy and White (1987)     |
| <i>Rangifer tarandus</i>        | 0            | 101.9     | 174.423    | Fancy and White (1987)     |
| <i>Rangifer tarandus</i>        | 5.1          | 96        | 443.808    | White and Yousef (1978)    |
| <i>Rangifer tarandus</i>        | 2.9          | 96        | 270.144    | White and Yousef (1978)    |
| <i>Rangifer tarandus</i>        | 0            | 96        | 192.960    | White and Yousef (1978)    |
| <i>Tamiasciurus hudsonicus</i>  | 0            | 0.252     | 3.951      | Wunder and Morrison (1974) |
| <i>Tamiasciurus hudsonicus</i>  | 6            | 0.252     | 5.926      | Wunder and Morrison (1974) |
| <i>Tamiasciurus hudsonicus</i>  | 18           | 0.252     | 5.774      | Wunder and Morrison (1974) |
| <i>Tamiasciurus hudsonicus</i>  | 30           | 0.252     | 7.547      | Wunder and Morrison (1974) |
| <i>Tamiasciurus hudsonicus</i>  | 37           | 0.252     | 8.813      | Wunder and Morrison (1974) |
| <i>Leptoptilos crumeniferus</i> | 0            | 4.5       | 23.048     | Bamford and Maloiy (1980)  |
| <i>Leptoptilos crumeniferus</i> | 3            | 4.5       | 17.286     | Bamford and Maloiy (1980)  |
| <i>Leptoptilos crumeniferus</i> | 5            | 4.5       | 32.897     | Bamford and Maloiy (1980)  |
| <i>Leptoptilos crumeniferus</i> | 7            | 4.5       | 44.220     | Bamford and Maloiy (1980)  |
| <i>Leptoptilos crumeniferus</i> | 9            | 4.5       | 51.657     | Bamford and Maloiy (1980)  |
| <i>Leptoptilos crumeniferus</i> | 11           | 4.5       | 33.634     | Bamford and Maloiy (1980)  |
| <i>Lagopus muta</i>             | 0            | 0.609     | 4.937      | Lees et al. (2013)         |
| <i>Lagopus muta</i>             | 4.2          | 0.723     | 6.424      | Lees et al. (2013)         |

| <b>Species</b>             | <b>Gradient<br/>(°)</b> | <b>Mass<br/>(kg)</b> | <b>NCOT<br/>(J/m)</b> | <b>Reference</b>             |
|----------------------------|-------------------------|----------------------|-----------------------|------------------------------|
| <i>Lagopus muta</i>        | 7.4                     | 0.723                | 7.930                 | Lees et al. (2013)           |
| <i>Ovis aries</i>          | 0                       | 40.9                 | 90.450                | Clapperton (1964)            |
| <i>Ovis aries</i>          | 2.7                     | 40.9                 | 139.786               | Clapperton (1964)            |
| <i>Ovis aries</i>          | 5.1                     | 40.9                 | 189.123               | Clapperton (1964)            |
| <i>Branta leucopsis</i>    | 7                       | 1.79                 | 13.457                | Nudds and Codd (2012)        |
| <i>Branta leucopsis</i>    | 0                       | 1.79                 | 12.345                | Nudds and Codd (2012)        |
| <i>Equus caballus</i>      | 0                       | 431                  | 787.941               | Wickler et al. (2000)        |
| <i>Equus caballus</i>      | 5.8                     | 431                  | 1988.823              | Wickler et al. (2000)        |
| <i>Equus caballus</i>      | 2.9                     | 492                  | 1878.948              | Eaton et al. (1995)          |
| <i>Equus caballus</i>      | 4.3                     | 492                  | 2112.992              | Eaton et al. (1995)          |
| <i>Equus caballus</i>      | 5.8                     | 492                  | 2370.112              | Eaton et al. (1995)          |
| <i>Numida meleagris</i>    | 0                       | 1.44                 | 11.578                | Ellerby et al. (2003)        |
| <i>Numida meleagris</i>    | 5.7                     | 1.44                 | 14.810                | Ellerby et al. (2003)        |
| <i>Numida meleagris</i>    | 11.3                    | 1.44                 | 23.010                | Ellerby et al. (2003)        |
| <i>Cervus canadensis</i>   | 0.46                    | 48.4                 | 223.892               | Cohen et al. (1978)          |
| <i>Cervus canadensis</i>   | 4.2                     | 48.4                 | 262.830               | Cohen et al. (1978)          |
| <i>Cervus canadensis</i>   | 11.7                    | 48.4                 | 330.971               | Cohen et al. (1978)          |
| <i>Canis lupus</i>         | 11.5                    | 12.8                 | 127.868               | Raab et al. (1976)           |
| <i>Canis lupus</i>         | 6.7                     | 12.8                 | 87.990                | Raab et al. (1976)           |
| <i>Canis lupus</i>         | 4.2                     | 12.8                 | 67.665                | Raab et al. (1976)           |
| <i>Canis lupus</i>         | 0                       | 12.8                 | 45.796                | Raab et al. (1976)           |
| <i>Panthera leo</i>        | 17.1                    | 53.5                 | 602.196               | Chassin et al. (1976)        |
| <i>Panthera leo</i>        | 12.6                    | 53.5                 | 408.633               | Chassin et al. (1976)        |
| <i>Panthera leo</i>        | 0                       | 53.5                 | 387.126               | Chassin et al. (1976)        |
| <i>Homo sapiens</i>        | 8.5                     | 70                   | 520.590               | Margarita et al. (1963)      |
| <i>Homo sapiens</i>        | 5.7                     | 70                   | 422.100               | Margarita et al. (1963)      |
| <i>Homo sapiens</i>        | 2.9                     | 70                   | 337.680               | Margarita et al. (1963)      |
| <i>Homo sapiens</i>        | 0                       | 70                   | 281.400               | Margarita et al. (1963)      |
| <i>Equus asinus</i>        | 9.6                     | 253.5                | 1528.605              | Yousef et al. (1972)         |
| <i>Equus asinus</i>        | 5.7                     | 253.5                | 815.256               | Yousef et al. (1972)         |
| <i>Equus asinus</i>        | 1.1                     | 253.5                | 458.582               | Yousef et al. (1972)         |
| <i>Equus asinus</i>        | 0                       | 253.5                | 254.768               | Yousef et al. (1972)         |
| <i>Bos taurus</i>          | 0                       | 161.5                | 430.173               | Ribeiro et al. (1977)        |
| <i>Bos taurus</i>          | 6                       | 161.5                | 655.186               | Ribeiro et al. (1977)        |
| <i>Ovis canadensis</i>     | 0                       | 40.7                 | 200.550               | Dailey and Hobbs (1989)      |
| <i>Ovis canadensis</i>     | 3.5                     | 40.7                 | 302.872               | Dailey and Hobbs (1989)      |
| <i>Ovis canadensis</i>     | 21.5                    | 40.7                 | 858.137               | Dailey and Hobbs (1989)      |
| <i>Oreamnos americanus</i> | 0                       | 30.7                 | 160.602               | Dailey and Hobbs (1989)      |
| <i>Oreamnos americanus</i> | 3.4                     | 30.7                 | 247.079               | Dailey and Hobbs (1989)      |
| <i>Oreamnos americanus</i> | 21.5                    | 30.7                 | 662.481               | Dailey and Hobbs (1989)      |
| <i>Cervus elaphus</i>      | 0                       | 68.3                 | 179.446               | Brockway and Gessaman (1977) |
| <i>Cervus elaphus</i>      | 7                       | 68.3                 | 332.058               | Brockway and Gessaman (1977) |
| <i>Cervus elaphus</i>      | 14                      | 68.3                 | 525.038               | Brockway and Gessaman (1977) |
| <i>Homo sapiens</i>        | 24.2                    | 61.2                 | 1186.859              | Minetti et al. (2002)        |

| <b>Species</b>        | <b>Gradient<br/>(°)</b> | <b>Mass<br/>(kg)</b> | <b>NCOT<br/>(J/m)</b> | <b>Reference</b>        |
|-----------------------|-------------------------|----------------------|-----------------------|-------------------------|
| <i>Homo sapiens</i>   | 21.8                    | 61.2                 | 1055.195              | Minetti et al. (2002)   |
| <i>Homo sapiens</i>   | 19.3                    | 61.2                 | 904.721               | Minetti et al. (2002)   |
| <i>Homo sapiens</i>   | 16.7                    | 61.2                 | 784.970               | Minetti et al. (2002)   |
| <i>Homo sapiens</i>   | 11.3                    | 61.2                 | 559.259               | Minetti et al. (2002)   |
| <i>Homo sapiens</i>   | 5.7                     | 61.2                 | 361.763               | Minetti et al. (2002)   |
| <i>Homo sapiens</i>   | 0                       | 61.2                 | 213.171               | Minetti et al. (2002)   |
| <i>Pavo cristatus</i> | 0                       | 4.58                 | 22.845                | Wilkinson et al. (2015) |
| <i>Pavo cristatus</i> | 5                       | 4.58                 | 40.406                | Wilkinson et al. (2015) |
| <i>Pavo cristatus</i> | 7                       | 4.58                 | 38.082                | Wilkinson et al. (2015) |

## References

- Armstrong, R. B., Laughlin, M. H., Rome, L. and Taylor, C. R.** (1983). Metabolism of rats running up and down an incline. *J. Appl. Physiol.* **55**, 518-521.
- Bamford, O. S. and Maloiy, G. M. O.** (1980). Energy metabolism and heart rate during treadmill exercise in the Marabou stork. *J. Appl. Physiol.* **49**, 491-496.
- Brockway, J. M. and Gessaman, J. A.** (1977). The energy cost of locomotion on the level and on gradients for the red deer (*Cervus elephus*). *Quarterly Journal of Experimental Physiology and Cognate Medical Sciences* **62**, 333-339.
- Brooks, G. A. and White, T. P.** (1978). Determination of metabolic and heart rate responses of rats to treadmill exercise. *J. Appl. Physiol.* **45**, 1009.
- Chassin, P. S., Taylor, C. R., Heglund, N. C. and Seeherman, H. J.** (1976). Locomotion in lions: energetic cost and maximum aerobic capacity. *Physiol. Zool.* **49**, 1-10.
- Clapperton, J. L.** (1964). The energy metabolism of sheep walking on the level and on gradients. *Br. J. Nutr.* **18**, 47-54.
- Cohen, Y., Robbins, C. T. and Davitt, B. B.** (1978). Oxygen utilization by elk calves during horizontal and vertical locomotion compared to other species. *Comparative Biochemistry and Physiology Part A: Physiology* **61**, 43-48.
- Dailey, T. V. and Hobbs, N. T.** (1989). Travel in alpine terrain: energy expenditures for locomotion by mountain goats and bighorn sheep. *Can. J. Zool.* **67**, 2368-2375.
- Eaton, M. D., Evans, D. L., Hodgson, D. R. and Rose, R. J.** (1995). Effect of treadmill incline and speed on metabolic rate during exercise in thoroughbred horses. *J. Appl. Physiol.* **79**, 951-957.
- Ellerby, D. J., Cleary, M., Marsh, R. L. and Buchanan, C. I.** (2003). Measurement of maximum oxygen consumption in Guinea fowl *Numida meleagris* indicates that birds and mammals display a similar diversity of aerobic scopes during running. *Physiol. Biochem. Zool.* **76**, 695-703.
- Fancy, S. G. and White, R. G.** (1987). Energy expenditures for locomotion by barren-ground caribou. *Can. J. Zool.* **65**, 122-128.
- Lees, J., Folkow, L., Stokkan, K.-A. and Codd, J.** (2013). The metabolic cost of incline locomotion in the Svalbard rock ptarmigan (*Lagopus muta hyperborea*): the effects of incline grade and seasonal fluctuations in body mass. *J. Exp. Biol.* **216**, 1355.
- Margaria, R., Cerretelli, P., Aghemo, P. and Sassi, G.** (1963). Energy cost of running. *J. Appl. Physiol.* **18**, 367-370.
- Minetti, A. E., Moia, C., Roi, G. S., Susta, D. and Ferretti, G.** (2002). Energy cost of walking and running at extreme uphill and downhill slopes. *J. Appl. Physiol.* **93**, 1039.
- Nudds, R. L. and Codd, J. R.** (2012). The metabolic cost of walking on gradients with a waddling gait. *J. Exp. Biol.* **215**, 2579.
- Raab, J. L., Eng, P. and Waschler, R. A.** (1976). Metabolic cost of grade running in dogs. *J. Appl. Physiol.* **41**, 532.
- Ribeiro, J. M. d. C. R., Brockway, J. M. and Webster, A. J. F.** (1977). A note on the energy cost of walking in cattle. *Anim. Sci.* **25**, 107-110.
- Snyder, G. K. and Carello, C. A.** (2008). Body mass and the energy efficiency of locomotion: Lessons from incline running. *Comparative Biochemistry and Physiology Part A: Molecular & Integrative Physiology* **150**, 144-150.

- Taylor, C. R., Caldwell, S. L. and Rowntree, V. J.** (1972). Running up and down hills: Some consequences of size. *Science* **178**, 1096-1097.
- Warncke, G., Bandholtz, J. and Schultze-Motel, P.** (1988). Metabolic cost and body temperatures during grade running in quail (*Coturnix coturnix*). *Comparative Biochemistry and Physiology Part A: Physiology* **89**, 93-96.
- White, R. G. and Yousef, M. K.** (1978). Energy expenditure in reindeer walking on roads and on tundra. *Can. J. Zool.* **56**, 215-223.
- Wickler, S. J., Hoyt, D. F., Cogger, E. A. and Hirschbein, M. H.** (2000). Preferred speed and cost of transport: the effect of incline. *J. Exp. Biol.* **203**, 2195.
- Wilkinson, H., Thavarajah, N. and Codd, J.** (2015). The metabolic cost of walking on an incline in the Peacock (*Pavo cristatus*). *PeerJ* **3**, e987.
- Wunder, B. A. and Morrison, P. R.** (1974). Red squirrel metabolism during incline running. *Comparative Biochemistry and Physiology Part A: Physiology* **48**, 153-161.
- Yousef, M. K., Dill, D. B. and Freeland, D. V.** (1972). Energetic cost of grade walking in man and burro, *Equus asinus*: desert and mountain. *J. Appl. Physiol.* **33**, 337.
